# Supplementary material for: Oral tolerance in the absence of naturally occurring Tregs
Source: JCI journal article supplement (doi:10.1172/jci24487), 2005-06-03
Supplement: sd1 [file 1]

301 Moved Permanently

# Moved Permanently

The document has moved here.
